# Supplementary material for: Transcriptomics Provide Insights into the Photoperiodic Regulation of Reproductive Diapause in the Green Lacewing, Chrysoperla nipponensis (Okamoto) (Neuroptera: Chrysopidae)
Source: MDPI journal article supplement (doi:10.3390/insects15020136), 2024-02-17
Supplement: s1 [file s1]

Figure S1 Validation of gene expressions by RT-qPCR.

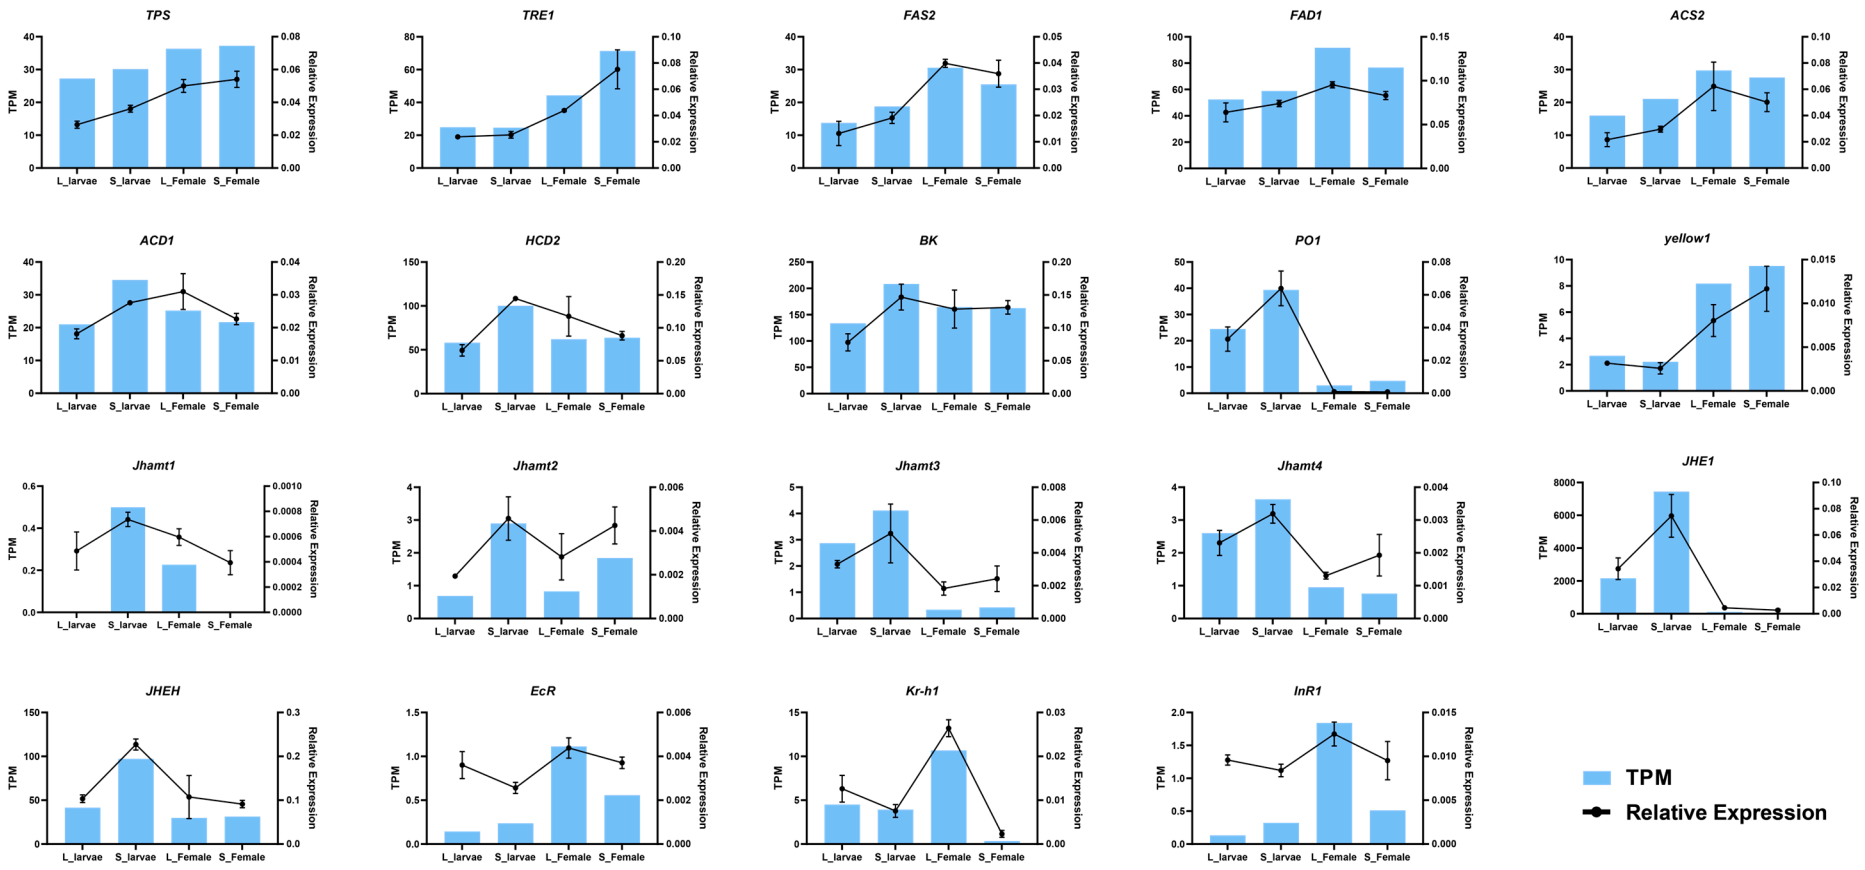

Table S1 Assembly result evaluation table

| Type                       | Unigene                    | Transcript                  |
|----------------------------|----------------------------|-----------------------------|
| Total number               | 71654                      | 104173                      |
| Total base                 | 68548641                   | 106753458                   |
| Largest length (bp)        | 19152                      | 19152                       |
| Smallest length (bp)       | 201                        | 201                         |
| Average length (bp)        | 956.66                     | 1024.77                     |
| N50 length (bp)            | 1637                       | 1725                        |
| E90N50 length (bp)         | 2335                       | 2174                        |
| Fragment mapped percent(%) | 75.205                     | 82.957                      |
| GC percent (%)             | 35.84                      | 35.26                       |
| TransRate score            | 0.38171                    | 0.41304                     |
| BUSCO score                | C: 98.0% [S:90.9%; D:7.1%] | C: 98.4% [S: 68%; D: 30.4%] |

Table S2 Table of Differential Gene Counts

| Different Group      | Total DEG | Up   | Down |
|----------------------|-----------|------|------|
| L_Female_vs_L_larvae | 10202     | 6790 | 3412 |
| S_Female_vs_S_larvae | 10221     | 7568 | 2653 |
| L_larvae_vs_S_larvae | 1021      | 717  | 304  |
| L_Female_vs_S_Female | 4051      | 3465 | 586  |

Table S3 Summary of the KEGG pathways involved in 3185 DEGs

| term                                                | enrichment  | pvalue      | count |
|-----------------------------------------------------|-------------|-------------|-------|
| Neuroactive ligand-receptor interaction             | 14.76985812 | 1.70E-15    | 44    |
| Drug metabolism - other enzymes                     | 4.639324619 | 2.29E-05    | 41    |
| Retinol metabolism                                  | 4.173024222 | 6.71E-05    | 26    |
| Steroid hormone biosynthesis                        | 2.993066064 | 0.001016094 | 22    |
| Valine, leucine and isoleucine degradation          | 2.93113727  | 0.001171825 | 21    |
| Fatty acid biosynthesis                             | 2.634109739 | 0.00232215  | 23    |
| Glycine, serine and threonine metabolism            | 2.62558966  | 0.002368156 | 28    |
| Glutathione metabolism                              | 2.53920285  | 0.00288933  | 29    |
| Ubiquinone and other terpenoid-quinone biosynthesis | 2.436576808 | 0.003659512 | 15    |
| Phagosome                                           | 2.434558804 | 0.003676556 | 29    |
| Fatty acid degradation                              | 2.272192254 | 0.005343278 | 19    |
| Nitrogen metabolism                                 | 2.115250699 | 0.007669187 | 11    |

Table S4 Summary of the KEGG pathways involved in 7017 DEGs

| term                                                | enrichment  | pvalue      | count |
|-----------------------------------------------------|-------------|-------------|-------|
| Ribosome                                            | 9.404759173 | 3.94E-10    | 210   |
| Cysteine and methionine metabolism                  | 1.019239825 | 0.095666564 | 54    |
| Wnt signaling pathway                               | 0.669852744 | 0.213868713 | 39    |
| Regulation of actin cytoskeleton                    | 0.591049579 | 0.256419129 | 47    |
| Viral life cycle - HIV-1                            | 0.579490273 | 0.263335693 | 24    |
| Phenylalanine, tyrosine and tryptophan biosynthesis | 0.373230732 | 0.423417952 | 23    |

Table S5 Summary of the KEGG pathways involved in 7036 DEGs

| term                                        | enrichment  | pvalue      | count |
|---------------------------------------------|-------------|-------------|-------|
| Protein export                              | 3.300505866 | 0.000500604 | 33    |
| Protein processing in endoplasmic reticulum | 3.237569082 | 0.00057867  | 121   |
| Proteasome                                  | 2.993915258 | 0.001014109 | 54    |
| RNA degradation                             | 2.881784908 | 0.00131285  | 81    |
| RNA polymerase                              | 1.995610531 | 0.010101584 | 40    |
| Spliceosome                                 | 1.777712998 | 0.016683494 | 96    |
| Ribosome                                    | 1.708541557 | 0.019564036 | 163   |
| Ribosome biogenesis in eukaryotes           | 1.508083468 | 0.03103963  | 83    |
| Glycerolipid metabolism                     | 1.317040477 | 0.048190288 | 44    |
| mRNA surveillance pathway                   | 1.216083193 | 0.060801852 | 62    |
| AMPK signaling pathway                      | 1.068082716 | 0.085490387 | 70    |
| Fatty acid biosynthesis                     | 1.031002925 | 0.09311016  | 35    |

Table S6 Summary of the KEGG pathways involved in 80 DEGs

| term                                 | enrichment  | pvalue      | count |
|--------------------------------------|-------------|-------------|-------|
| Caffeine metabolism                  | 0.761695835 | 0.173102829 | 1     |
| Glycosaminoglycan degradation        | 0.744034386 | 0.180287499 | 1     |
| FoxO signaling pathway               | 0.738256246 | 0.18270219  | 2     |
| Glutathione metabolism               | 0.719965845 | 0.190561058 | 2     |
| Insect hormone biosynthesis          | 0.717808581 | 0.191509984 | 1     |
| Cutin, suberine and wax biosynthesis | 0.701455448 | 0.19885868  | 1     |

Table S7 Summary of the KEGG pathways involved in 941 DEGs

| term                                    | enrichment  | pvalue      | count |
|-----------------------------------------|-------------|-------------|-------|
| Ribosome                                | 24.8713652  | 1.34E-25    | 66    |
| Neuroactive ligand-receptor interaction | 2.31654719  | 0.004824506 | 10    |
| Retinol metabolism                      | 2.052850375 | 0.008854206 | 9     |
| Arachidonic acid metabolism             | 1.140345207 | 0.072386036 | 5     |
| Peroxisome                              | 1.137691724 | 0.072829659 | 12    |
| ECM-receptor interaction                | 0.976948642 | 0.105451159 | 4     |

Table S8 Summary of the KEGG pathways involved in 3971 DEGs

| term                                 | enrichment  | pvalue      | count |
|--------------------------------------|-------------|-------------|-------|
| Fatty acid biosynthesis              | 4.61807532  | 2.41E-05    | 37    |
| AMPK signaling pathway               | 2.275992189 | 0.00529673  | 57    |
| Ribosome biogenesis in eukaryotes    | 1.515869271 | 0.030488126 | 60    |
| Nucleocytoplasmic transport          | 1.169038736 | 0.067758107 | 60    |
| RNA polymerase                       | 1.136407749 | 0.073045296 | 27    |
| Cutin, suberine and wax biosynthesis | 1.061835822 | 0.086728968 | 15    |

Table S9. Genetic pathways and expression levels TPM

**Trehalose Metabolism**

| Gene_id               | Nr_description                                                              | Gene Name | L_larvae | S_larvae | L_Female | S_Female |
|-----------------------|-----------------------------------------------------------------------------|-----------|----------|----------|----------|----------|
| TRINITY_DN22757_c0_g1 | alpha,alpha-trehalose-phosphate synthase [UDP-forming] [Chrysoperla carnea] | TPS       | 27.2933  | 30.1133  | 36.3567  | 37.2367  |
| TRINITY_DN12693_c0_g1 | facilitated trehalose transporter Tret1-2 homolog [Chrysoperla carnea]      | TRE1      | 24.8867  | 24.65    | 44.33    | 71.3567  |
| TRINITY_DN3456_c0_g1  | facilitated trehalose transporter Tret1-2 homolog [Chrysoperla carnea]      | TRE2      | 24.65    | 23.51    | 25.66    | 45.8167  |

|                       |                                                                   |      |         |         |         |         |
|-----------------------|-------------------------------------------------------------------|------|---------|---------|---------|---------|
| TRINITY_DN11473_c1_g1 | facilitated trehalose transporter Tret1-like [Chrysoperla carnea] | TRE3 | 24.2433 | 10.8967 | 9.12    | 25.13   |
| TRINITY_DN1315_c2_g1  | facilitated trehalose transporter Tret1-like [Chrysoperla carnea] | TRE4 | 84.8933 | 78.14   | 30.2667 | 23.9133 |
| TRINITY_DN1696_c0_g1  | facilitated trehalose transporter Tret1-like [Chrysoperla carnea] | TRE5 | 9.1867  | 16.5433 | 6.3567  | 7.4367  |
| TRINITY_DN2580_c0_g1  | facilitated trehalose transporter Tret1-like [Chrysoperla carnea] | TRE6 | 22.4467 | 26.03   | 38.75   | 46.98   |
| TRINITY_DN3405_c0_g1  | facilitated trehalose transporter Tret1-like [Chrysoperla carnea] | TRE7 | 23.4    | 16.9133 | 6.6833  | 19.9933 |

### Fatty Acid Metabolism

| Gene_id               | Nr_description                                                   | Gene Name | L_larvae | S_larvae | L_Female | S_Female |
|-----------------------|------------------------------------------------------------------|-----------|----------|----------|----------|----------|
| TRINITY_DN11122_c0_g2 | fatty acid synthase [Chrysoperla carnea]                         | FAS1      | 43.9167  | 27.5767  | 80.9233  | 82.37    |
| TRINITY_DN2240_c0_g1  | fatty acid synthase [Chrysoperla carnea]                         | FAS2      | 13.7933  | 18.7767  | 30.5867  | 25.5333  |
| TRINITY_DN13133_c1_g1 | fatty acid synthase-like [Chrysoperla carnea]                    | FAS3      | 50.2967  | 9.94     | 4.35     | 0        |
| TRINITY_DN18475_c0_g1 | fatty acid synthase-like [Chrysoperla carnea]                    | FAS4      | 28.4433  | 31.1233  | 19.55    | 0.27     |
| TRINITY_DN366_c0_g1   | acetyl-CoA carboxylase isoform X1 [Chrysoperla carnea]           | ACC       | 25.5867  | 27.97    | 33.3133  | 43.28    |
| TRINITY_DN9587_c0_g1  | acyl-CoA Delta-9 desaturase [Chrysoperla carnea]                 | FAD1      | 52.3933  | 58.8567  | 91.7467  | 76.67    |
| TRINITY_DN13729_c0_g1 | acyl-CoA Delta-9 desaturase-like [Chrysoperla carnea]            | FAD2      | 51.9867  | 110.7667 | 111.26   | 102.2233 |
| TRINITY_DN19300_c0_g1 | acyl-CoA Delta-9 desaturase-like [Chrysoperla carnea]            | FAD3      | 6.13     | 0        | 18.5033  | 30.1867  |
| TRINITY_DN2347_c0_g1  | acyl-CoA Delta-9 desaturase-like [Chrysoperla carnea]            | FAD4      | 34.9133  | 10.5     | 37.8667  | 164.59   |
| TRINITY_DN2347_c1_g1  | acyl-CoA Delta-9 desaturase-like [Chrysoperla carnea]            | FAD5      | 2.6133   | 0        | 3.27     | 43.0433  |
| TRINITY_DN441_c0_g1   | acyl-CoA Delta-9 desaturase-like [Chrysoperla carnea]            | FAD6      | 6        | 1.2133   | 9.99     | 50.1467  |
| TRINITY_DN34529_c0_g1 | acyl-CoA Delta-9 desaturase-like isoform X2 [Chrysoperla carnea] | FAD7      | 2.5      | 0.0567   | 11.4867  | 56.9933  |

|                       |                                                                                      |        |           |           |          |         |
|-----------------------|--------------------------------------------------------------------------------------|--------|-----------|-----------|----------|---------|
| TRINITY_DN161_c0_g2   | sphingolipid delta(4)                                                                | FAD8   | 10.8833   | 9.61      | 18.6633  | 17.86   |
| TRINITY_DN11624_c0_g1 | lipid storage droplets surface-binding protein 1 isoform X2 [Chrysoperla carnea]     | LSD1   | 74.8733   | 126.4433  | 160.8833 | 253.51  |
| TRINITY_DN31336_c0_g1 | lipid storage droplets surface-binding protein 2 isoform X2 [Chrysoperla carnea]     | LSD2   | 66.2167   | 64.3367   | 133.65   | 68.53   |
| TRINITY_DN7315_c0_g1  | hormone-sensitive lipase [Chrysoperla carnea]                                        | Lipase | 1.1267    | 2.56      | 3.4367   | 3.74    |
| TRINITY_DN1996_c5_g2  | long-chain fatty acid transport protein 4 [Chrysoperla carnea]                       | FATP1  | 4.49      | 5.89      | 7.4167   | 3.35    |
| TRINITY_DN6463_c0_g1  | long-chain fatty acid transport protein 4 [Chrysoperla carnea]                       | FATP2  | 13.5567   | 20.67     | 17.5633  | 12.97   |
| TRINITY_DN2495_c0_g1  | fatty acid-binding protein, heart-like [Chrysoperla carnea]                          | FABP1  | 441.5233  | 1654.7367 | 0.0367   | 0       |
| TRINITY_DN1625_c0_g1  | fatty acid-binding protein, liver-type-like [Chrysoperla carnea]                     | FABP2  | 3721.6333 | 3397.9867 | 434.77   | 500.98  |
| TRINITY_DN453_c0_g1   | long-chain-fatty-acid--CoA ligase 1 isoform X1 [Chrysoperla carnea]                  | ACS1   | 7.8533    | 13.98     | 12.0133  | 13.1467 |
| TRINITY_DN15243_c0_g1 | long-chain-fatty-acid--CoA ligase 4 isoform X1 [Chrysoperla carnea]                  | ACS2   | 15.9933   | 21.0767   | 29.7467  | 27.5733 |
| TRINITY_DN317_c0_g1   | long-chain-fatty-acid--CoA ligase ACSBG2-like [Chrysoperla carnea]                   | ACS3   | 26.4967   | 28.75     | 53.74    | 57.8267 |
| TRINITY_DN6578_c0_g3  | carnitine O-acetyltransferase-like [Chrysoperla carnea]                              | CPT1   | 13.8133   | 20.9567   | 11.5667  | 13.3033 |
| TRINITY_DN1032_c0_g2  | carnitine O-palmitoyltransferase 1, liver isoform isoform X1 [Chrysoperla carnea]    | CPT2   | 3.9567    | 4.96      | 8.5167   | 4.8333  |
| TRINITY_DN12107_c0_g1 | carnitine O-palmitoyltransferase 2, mitochondrial [Chrysoperla carnea]               | CPT3   | 3.88      | 0.9533    | 4.1467   | 1.55    |
| TRINITY_DN49490_c0_g1 | carnitine O-palmitoyltransferase 2, mitochondrial [Chrysoperla carnea]               | CPT4   | 3.2833    | 2.4033    | 3.1667   | 1.1933  |
| TRINITY_DN702_c0_g2   | carnitine O-palmitoyltransferase 2, mitochondrial [Chrysoperla carnea]               | CPT5   | 11.55     | 12.5333   | 15.1733  | 9.24    |
| TRINITY_DN39898_c0_g1 | short-chain specific acyl-CoA dehydrogenase, mitochondrial [Chrysoperla carnea]      | ACD1   | 21.0167   | 34.5233   | 25.22    | 21.67   |
| TRINITY_DN2714_c0_g1  | short-chain specific acyl-CoA dehydrogenase, mitochondrial-like [Chrysoperla carnea] | ACD2   | 4.5633    | 6.0133    | 4.85     | 4.4533  |
| TRINITY_DN8646_c0_g1  | isovaleryl-CoA dehydrogenase, mitochondrial [Chrysoperla carnea]                     | ACD3   | 37.7867   | 48.1367   | 7.4967   | 6.25    |
| TRINITY_DN11696_c0_g2 | probable enoyl-CoA hydratase, mitochondrial [Chrysoperla carnea]                     | ACD4   | 205.76    | 357.89    | 104.31   | 120.12  |

|                       |                                                                                       |      |          |          |          |         |
|-----------------------|---------------------------------------------------------------------------------------|------|----------|----------|----------|---------|
| TRINITY_DN14742_c0_g2 | probable enoyl-CoA hydratase, mitochondrial isoform X1 [Chrysoperla carnea]           | ACD5 | 41.2667  | 76.76    | 5.7367   | 6.2533  |
| TRINITY_DN3489_c0_g1  | 3-hydroxyacyl-CoA dehydrogenase type-2-like [Chrysoperla carnea]                      | HCD1 | 14.95    | 15.4367  | 10.9067  | 9.6433  |
| TRINITY_DN18976_c0_g1 | hydroxyacyl-coenzyme A dehydrogenase, mitochondrial-like [Chrysoperla carnea]         | HCD2 | 58.03    | 100.1633 | 62.0467  | 63.8567 |
| TRINITY_DN2959_c0_g1  | 3-hydroxyisobutyryl-CoA hydrolase, mitochondrial-like isoform X1 [Chrysoperla carnea] | HCD3 | 31.0967  | 45.7733  | 21.1967  | 18.5067 |
| TRINITY_DN25428_c0_g1 | 3-ketoacyl-CoA thiolase, mitochondrial [Chrysoperla carnea]                           | BK   | 133.7167 | 208.4867 | 164.5333 | 162.6   |

### Pigment Biosynthetic Pathways

| Gene_id               | Nr_description                                                      | Gene Name | L_larvae | S_larvae | L_Female | S_Female |
|-----------------------|---------------------------------------------------------------------|-----------|----------|----------|----------|----------|
| TRINITY_DN9568_c0_g1  | 4,5-DOPA dioxygenase extradiol-like isoform X1 [Chrysoperla carnea] | DODA      | 18.62    | 29.14    | 13.34    | 10.9267  |
| TRINITY_DN12781_c0_g1 | L-dopachrome tautomerase yellow-f2-like [Chrysoperla carnea]        | Dct1      | 24.81    | 19.63    | 30.36    | 26.0933  |
| TRINITY_DN576_c0_g2   | L-dopachrome tautomerase yellow-f2-like [Chrysoperla carnea]        | Dct2      | 30.23    | 45.5567  | 5.5      | 9.9733   |
| TRINITY_DN22162_c0_g1 | phenoloxidase 1-like [Chrysoperla carnea]                           | PO1       | 24.47    | 39.3767  | 3.0067   | 4.7833   |
| TRINITY_DN56348_c0_g1 | phenoloxidase 1-like [Chrysoperla carnea]                           | PO2       | 23.02    | 26.17    | 2.1933   | 0        |
| TRINITY_DN7360_c0_g1  | phenoloxidase 1-like isoform X1 [Chrysoperla carnea]                | PO3       | 39.3867  | 48.5367  | 16.97    | 13.3033  |
| TRINITY_DN2424_c0_g1  | protein yellow-like [Chrysoperla carnea]                            | yellow1   | 2.6833   | 2.2167   | 8.1833   | 9.5167   |
| TRINITY_DN25958_c0_g1 | protein yellow-like [Chrysoperla carnea]                            | yellow2   | 2.87     | 1.67     | 3.1933   | 4.4267   |
| TRINITY_DN22556_c0_g1 | laccase-8-like [Chrysoperla carnea]                                 | laccase1  | 6.52     | 16.22    | 0.1767   | 0.19     |
| TRINITY_DN231_c0_g1   | laccase-8-like [Chrysoperla carnea]                                 | laccase2  | 213.28   | 248.3    | 25.0033  | 21.6267  |
| TRINITY_DN28260_c0_g1 | laccase-8-like [Chrysoperla carnea]                                 | laccase3  | 6.3333   | 11.5633  | 0.5633   | 0        |
| TRINITY_DN40541_c0_g1 | laccase-8-like [Chrysoperla carnea]                                 | laccase4  | 8.44     | 15.8933  | 0.0667   | 0.42     |

|                       |                                                                           |          |         |          |         |         |
|-----------------------|---------------------------------------------------------------------------|----------|---------|----------|---------|---------|
| TRINITY_DN53755_c0_g1 | laccase-8-like [Chrysoperla carnea]                                       | laccase5 | 18.33   | 47.6333  | 2.5467  | 4.11    |
| TRINITY_DN53758_c0_g1 | laccase-8-like [Chrysoperla carnea]                                       | laccase6 | 14.17   | 45.5567  | 0.77    | 0.6567  |
| TRINITY_DN8279_c0_g1  | laccase-8-like [Chrysoperla carnea]                                       | laccase7 | 81.83   | 76.6433  | 10.5733 | 10.6533 |
| TRINITY_DN12219_c0_g1 | GTP cyclohydrolase 1 isoform X2 [Chrysoperla carnea]                      | Gch1     | 67.1067 | 138.8733 | 124.38  | 56.4033 |
| TRINITY_DN1710_c0_g1  | arylalkylamine N-acetyltransferase 1-like isoform X1 [Chrysoperla carnea] | aaNAT    | 1.3067  | 1.9267   | 2.0333  | 1.7033  |
| TRINITY_DN15636_c0_g1 | tryptophan 2,3-dioxygenase [Chrysoperla carnea]                           | TDO      | 6.34    | 5.4767   | 1.24    | 1.51    |
| TRINITY_DN15805_c0_g1 | kynurenine formamidase-like [Chrysoperla carnea]                          | Kfase1   | 12.97   | 13.9733  | 12.5767 | 16.75   |
| TRINITY_DN30885_c0_g2 | kynurenine formamidase-like [Chrysoperla carnea]                          | Kfase2   | 8.5433  | 9.36     | 16.12   | 14.4    |
| TRINITY_DN26062_c0_g1 | protein white [Chrysoperla carnea]                                        | white1   | 0.75    | 0.5867   | 5.98    | 3.0033  |
| TRINITY_DN4325_c0_g1  | protein white [Crassostrea gigas]                                         | white2   | 0.2733  | 0.01     | 1.9133  | 4.26    |
| TRINITY_DN35773_c0_g1 | protein scarlet [Chrysoperla carnea]                                      | scarlet1 | 0.18    | 0.4067   | 0.1733  | 0       |
| TRINITY_DN35773_c0_g3 | protein scarlet [Chrysoperla carnea]                                      | scarlet2 | 0.42    | 0.4267   | 0.0633  | 0.1567  |
| TRINITY_DN417_c8_g1   | sepiapterin reductase-like [Chrysoperla carnea]                           | Spr      | 11.23   | 12.2267  | 24.54   | 14.92   |

### Ovarian development

| Gene_id               | Nr_description                                  | Gene Name | L_larvae | S_larvae | L_Female  | S_Female |
|-----------------------|-------------------------------------------------|-----------|----------|----------|-----------|----------|
| TRINITY_DN18142_c0_g3 | vitellogenin [Chrysoperla nipponensis]          | Vg        | 0.0033   | 0.0167   | 1888.3933 | 0.0133   |
| TRINITY_DN7774_c0_g1  | vitellogenin receptor [Chrysoperla nipponensis] | VgR       | 0.1433   | 0.12     | 29.4233   | 6.6433   |

## Juvenile Hormone Pathway

| Gene_id               | Nr_description                                                       | Gene Name | L_larvae | S_larvae | L_Female | S_Female |
|-----------------------|----------------------------------------------------------------------|-----------|----------|----------|----------|----------|
| TRINITY_DN6938_c0_g1  | 3-hydroxy-3-methylglutaryl-coenzyme A reductase [Chrysoperla carnea] | HMGR      | 4.2067   | 4.9      | 15.4167  | 7.25     |
| TRINITY_DN7440_c0_g1  | mevalonate kinase [Chrysoperla carnea]                               | MevK      | 7.9233   | 8.0633   | 9.44     | 7.06     |
| TRINITY_DN1968_c0_g1  | probable phosphomevalonate kinase [Chrysoperla carnea]               | PMK       | 5.36     | 5.3067   | 5.0233   | 3.8667   |
| TRINITY_DN5471_c0_g1  | diphosphomevalonate decarboxylase isoform X1 [Chrysoperla carnea]    | PPMD      | 3.65     | 4.3067   | 5.31     | 3.7567   |
| TRINITY_DN485_c0_g1   | farnesyl pyrophosphate synthase [Chrysoperla carnea]                 | FPPS      | 22.7867  | 34.55    | 17.81    | 25.9733  |
| TRINITY_DN20191_c0_g2 | farnesyl diphosphate pyrophosphatase [Pardosa pseudoannulata]        | FPP       | 0.01     | 0        | 1.0267   | 0.52     |
| TRINITY_DN11572_c1_g2 | farnesol dehydrogenase-like [Chrysoperla carnea]                     | FOLD1     | 14.7633  | 17.5367  | 40.7333  | 36.1     |
| TRINITY_DN12303_c0_g1 | farnesol dehydrogenase-like [Chrysoperla carnea]                     | FOLD2     | 15.69    | 270.9933 | 0.0267   | 0        |
| TRINITY_DN15737_c0_g2 | farnesol dehydrogenase-like [Chrysoperla carnea]                     | FOLD3     | 50.4867  | 58.9133  | 75.8133  | 102.9467 |
| TRINITY_DN20157_c0_g1 | farnesol dehydrogenase-like [Chrysoperla carnea]                     | FOLD4     | 25.4867  | 22.1067  | 29.2133  | 31.4433  |
| TRINITY_DN2784_c0_g1  | farnesol dehydrogenase-like [Chrysoperla carnea]                     | FOLD5     | 37.9333  | 57.1533  | 23.1333  | 22.1067  |
| TRINITY_DN3695_c0_g1  | farnesol dehydrogenase-like [Chrysoperla carnea]                     | FOLD6     | 39.62    | 59.4267  | 126.7    | 140.9133 |
| TRINITY_DN40785_c0_g1 | farnesol dehydrogenase-like [Chrysoperla carnea]                     | FOLD7     | 99.96    | 119.6267 | 56.4533  | 74.3067  |
| TRINITY_DN6689_c0_g1  | farnesol dehydrogenase-like [Chrysoperla carnea]                     | FOLD8     | 110.9267 | 114.2433 | 5.2967   | 6.2067   |
| TRINITY_DN7741_c0_g1  | farnesol dehydrogenase-like [Chrysoperla carnea]                     | FOLD9     | 200.6567 | 229.64   | 9.5      | 14.31    |
| TRINITY_DN8871_c0_g1  | farnesol dehydrogenase-like [Chrysoperla carnea]                     | FOLD10    | 5.7433   | 4.8033   | 23.5233  | 25.3633  |
| TRINITY_DN21893_c0_g1 | farnesol dehydrogenase-like isoform X2 [Chrysoperla carnea]          | FOLD11    | 159.6967 | 238.84   | 142.21   | 149.6    |
| TRINITY_DN66519_c0_g1 | juvenile hormone acid O-methyltransferase-like [Chrysoperla carnea]  | Jhamt1    | 0        | 0.5      | 0.2267   | 0        |

|                       |                                                                           |        |           |           |          |          |
|-----------------------|---------------------------------------------------------------------------|--------|-----------|-----------|----------|----------|
| TRINITY_DN6733_c0_g1  | juvenile hormone acid O-methyltransferase-like [Chrysoperla carnea]       | Jhamt2 | 0.6867    | 2.9       | 0.83     | 1.8433   |
| TRINITY_DN11222_c0_g1 | juvenile hormone acid O-methyltransferase-like [Chrysoperla carnea]       | Jhamt3 | 2.8667    | 4.1133    | 0.3367   | 0.4233   |
| TRINITY_DN53892_c1_g1 | juvenile hormone acid O-methyltransferase-like [Chrysoperla carnea]       | Jhamt4 | 2.6033    | 3.63      | 0.9533   | 0.7567   |
| TRINITY_DN17011_c0_g1 | juvenile hormone esterase-like [Chrysoperla carnea]                       | JHE1   | 2162.0167 | 7441.5733 | 108.5833 | 30.43    |
| TRINITY_DN376_c0_g1   | juvenile hormone esterase-like [Chrysoperla carnea]                       | JHE2   | 1331.4067 | 3391.0767 | 787.53   | 386.4367 |
| TRINITY_DN64387_c0_g1 | juvenile hormone esterase-like [Chrysoperla carnea]                       | JHE3   | 1264.9467 | 3574.3567 | 1466.55  | 644.5033 |
| TRINITY_DN25498_c0_g1 | juvenile hormone epoxide hydrolase 1-like isoform X1 [Chrysoperla carnea] | JHEH   | 41.59     | 97.2333   | 29.8567  | 31.25    |

## Ecdysteroid Pathway

| Gene_id               | Nr_description                                                                | Gene Name    | L_larvae | S_larvae | L_Female | S_Female |
|-----------------------|-------------------------------------------------------------------------------|--------------|----------|----------|----------|----------|
| TRINITY_DN19991_c0_g2 | cytochrome P450 307a1-like [Chrysoperla carnea]                               | Spook1       | 0        | 0.21     | 0.7833   | 0        |
| TRINITY_DN45471_c0_g2 | cytochrome P450 307a1-like [Chrysoperla carnea]                               | Spook2       | 0.0633   | 0        | 0.44     | 0        |
| TRINITY_DN38455_c0_g1 | cytochrome P450 306a1 [Chrysoperla carnea]                                    | Phantom      | 0.0567   | 0.0833   | 1.23     | 0.2133   |
| TRINITY_DN11969_c0_g2 | cytochrome P450 302a1, mitochondrial-like [Chrysoperla carnea]                | Disembodied1 | 3.36     | 3.4367   | 0.0333   | 0.01     |
| TRINITY_DN31857_c0_g1 | cytochrome P450 302a1, mitochondrial-like [Chrysoperla carnea]                | Disembodied2 | 0.1467   | 0.38     | 0.3767   | 0.15     |
| TRINITY_DN10672_c0_g1 | cytochrome P450 315a1, mitochondrial [Chrysoperla carnea]                     | Shadow       | 1.95     | 4.32     | 21.54    | 12.12    |
| TRINITY_DN7643_c1_g1  | ecdysone receptor [Chrysoperla carnea]                                        | EcR          | 0.1433   | 0.2367   | 1.1133   | 0.5567   |
| TRINITY_DN17054_c0_g1 | broad-complex core protein isoform X1 [Chrysoperla carnea]                    | Br-C1        | 0.54     | 1.6533   | 0.1367   | 0.05     |
| TRINITY_DN4568_c0_g1  | broad-complex core protein isoforms 1/2/3/4/5 isoform X2 [Chrysoperla carnea] | Br-C2        | 0.4167   | 0.4633   | 1.7067   | 0.91     |
| TRINITY_DN17054_c0_g3 | broad-complex core protein isoforms 1/2/3/4/5 isoform X3 [Chrysoperla carnea] | Br-C3        | 0.7433   | 0.9133   | 0.1567   | 0        |

|                       |                                                                 |       |        |        |         |        |
|-----------------------|-----------------------------------------------------------------|-------|--------|--------|---------|--------|
| TRINITY_DN20840_c0_g1 | broad-complex core protein-like isoform X1 [Chrysoperla carnea] | Br-C4 | 0.8767 | 1.6633 | 0.9533  | 0.9533 |
| TRINITY_DN12825_c0_g1 | ecdysone-induced protein 74EF isoform X1 [Chrysoperla carnea]   | E74A  | 0.9833 | 4.91   | 1.2167  | 0.81   |
| TRINITY_DN6000_c0_g1  | ecdysone-inducible protein E75 isoform X1 [Chrysoperla carnea]  | E75   | 3.1933 | 5.5867 | 5.5933  | 4.2233 |
| TRINITY_DN23217_c0_g1 | Krueppel homolog 1-like [Chrysoperla carnea]                    | Kr-h1 | 4.5067 | 3.93   | 10.6833 | 0.3467 |

### Insulin Pathway

| Gene_id               | Nr_description                                                                                        | Gene Name | L_larvae | S_larvae | L_Female | S_Female |
|-----------------------|-------------------------------------------------------------------------------------------------------|-----------|----------|----------|----------|----------|
| TRINITY_DN21415_c0_g1 | insulin receptor substrate 1 isoform X4 [Chrysoperla carnea]                                          | InR1      | 0.1333   | 0.3233   | 1.84     | 0.5133   |
| TRINITY_DN5561_c0_g1  | insulin-like receptor isoform X1 [Chrysoperla carnea]                                                 | InR2      | 0.11     | 0.23     | 1        | 0.2867   |
| TRINITY_DN32751_c0_g1 | forkhead box protein O [Chrysoperla carnea]                                                           | FoxO      | 1.4867   | 1.9667   | 2.9167   | 3.08     |
| TRINITY_DN17943_c0_g1 | 5'-AMP-activated protein kinase subunit beta-1 [Chrysoperla carnea]                                   | AMPK      | 15.9967  | 22.0833  | 24.5     | 23.7867  |
| TRINITY_DN43526_c0_g1 | phosphatidylinositol 4-phosphate 3-kinase C2 domain-containing subunit beta-like [Chrysoperla carnea] | PI3K1     | 0.41     | 1.16     | 0.6967   | 0.4      |
| TRINITY_DN9406_c0_g1  | phosphatidylinositol 4-phosphate 3-kinase C2 domain-containing subunit beta-like [Chrysoperla carnea] | PI3K2     | 0.2733   | 0.49     | 1.64     | 0.67     |

### Table S10 Major primer sequences in this study

| Gene Name | Forward primers | Sequence           | Reverse primers | Sequence            |
|-----------|-----------------|--------------------|-----------------|---------------------|
| TPS       | TPS-F           | TTTTCGACGTTTCGTCCC | TPS-R           | CAGATTGGCTATTCTTCCG |
| TRE1      | TRE1-F          | CAACAGCCATACCCACAC | TRE1-R          | GCGTACAAATCGGTTCAAG |
| FAS2      | FAS2-F          | CAGGGAATAGATTGCGAC | FAS2-R          | AGAAGATTGGACAGTGGCT |
| FAD1      | FAD1-F          | CCAGTTGCAGCATTCTCT | FAD1-R          | GGCCACTGGATTACGTAC  |

|         |               |                                                  |               |                                                   |
|---------|---------------|--------------------------------------------------|---------------|---------------------------------------------------|
| ACS2    | ACS2-F        | TCAACACCGTAGCATCACC                              | ACS2-R        | GCTTCTTACCATTGGCACA                               |
| ACD1    | ACD1-F        | AGGAGCAGCATCAACTATG                              | ACD1-R        | CCTTCACTTTTCGTAACCG                               |
| HCD2    | HCD2-F        | TGGGTTCAAGGAATTGCAC                              | HCD2-R        | CACCATCTTGTGGCTTATCT                              |
| BK      | BK-F          | ACTAATCGGGCAAGTGGT                               | BK-R          | GGCTTCTGGAATCTGTGA                                |
| PO1     | PO1-F         | ATTGTGGTTGTGGATGGC                               | PO1-R         | GACGAATCTGAACACGGAC                               |
| yellow1 | yellow1-F     | CCACTGCTCGGGTCTTAT                               | yellow1-R     | GCACCATGTATTTCCATCC                               |
| Jhamt1  | Jhamt1-F      | CCAAGTTTAGAAATTGATTCATATAT                       | Jhamt1-R      | TTGAAACCAAAAAGGTGATGTG                            |
| Jhamt2  | Jhamt2-F      | CGGTAAATCCATTCTGAATCG                            | Jhamt2-R      | GCGTACACAATAAGTTCGTCAT                            |
| Jhamt3  | Jhamt3-F      | TTACCGCACCATCTCCGCA                              | Jhamt3-R      | CGCTTCAGTAAACGTGGTAACAAG                          |
| Jhamt4  | Jhamt4-F      | AACGATTGTTGGCACAGATC                             | Jhamt4-R      | GGCAAAGTTTTTACCCCG                                |
| JHE1    | JHE1-F        | ATGGCTCAGGTGGTTGGGGT                             | JHE1-R        | GGCGTATTGCTAAAGATGCGAA                            |
| JHEH    | JHEH-F        | TGCAAAATGTCCGCCTCT                               | JHEH-R        | CCAACAAATGTTCCATCAGC                              |
| EcR     | EcR-F         | GATGACTGGCTAACAACGA                              | EcR-R         | CTGTAAACGAATGTCCTGG                               |
| Kr-h1   | Kr-h1-F       | ATACCGGCGAGAAACCGT                               | Kr-h1-R       | GACCATAATGTGCCACTTGA                              |
| InR1    | InR1-F        | AAGGTCCACAGTCAGCAGG                              | InR1-R        | TTTGATGGAGGACTTGCG                                |
| Jhamt1  | dsJhamt1-T7-F | taatacgactcactataggATTAAATCCTCGTAAATAAATG<br>TTC | dsJhamt1-T7-R | taatacgactcactataggTTAGTTACATATCTCGCAAGTA<br>ATCC |
|         | dsJhamt1-F    | ATTAAATCCTCGTAAATAAATGTTC                        | dsJhamt1-R    | TTAGTTACATATCTCGCAAGTAATCC                        |
| GFP     | dsGFP-T7-F    | taatacgactcactataggTGACCCTGAAGTTCATCTG           | dsGFP-T7-R    | taatacgactcactataggGGTGTCTGCTGGTAGTG              |
|         | dsGFP-F       | TGACCCTGAAGTTCATCTG                              | dsGFP-R       | GGTGTCTGCTGGTAGTG                                 |

---
